# Supplementary material for: Pre-clinical studies of EC2629, a highly potent folate- receptor-targeted DNA crosslinking agent
Source: PubMed Central journal article supplement (PMC7391724; doi:10.1038/s41598-020-69682-9), 2020-07-29
Supplement: 41598_2020_69682_MOESM1_ESM.pdf [file 41598_2020_69682_MOESM1_ESM.pdf]

## Pre-clinical studies of EC2629, a highly potent folate- receptor-targeted DNA crosslinking agent

*Joseph A. Reddy<sup>1</sup>, Melissa Nelson<sup>1</sup>, Christina Dirksen<sup>1</sup>, Marilyn Vetzel<sup>1</sup>, Theresa Johnson<sup>1</sup>, Vicky Cross<sup>1</sup>, Elaine Westrick<sup>1</sup>, LongWu Qi<sup>1</sup>, Spencer Hahn<sup>1</sup>, Hari Krishna Santhapuram<sup>1</sup>, Garth Parham<sup>1</sup>, Kevin Wang<sup>1</sup>, Jeremy F. Vaughn<sup>1</sup>, Albert Felten<sup>1</sup>, Michael Pugh<sup>1</sup>, June Lu<sup>1</sup>, Patrick Klein<sup>1</sup>, Iontcho R. Vlahov<sup>1</sup> and Christopher P. Leamon<sup>1</sup>*

### Supplementary Information:

**Supplementary Table S1. Relative potencies of base drugs and associated folate-based SMDCs on KB cells**

| Base Drug |                       |                  | SMDC   |                       |                  |
|-----------|-----------------------|------------------|--------|-----------------------|------------------|
| Name      | IC <sub>50</sub> (pM) | Relative Potency | Name   | IC <sub>50</sub> (pM) | Relative Potency |
| DAVLBH    | 35,000                | 1                | EC145  | 9,000                 | 1                |
| EC0347    | 2500                  | 14               | EC1456 | 1500                  | 6                |
| EC2491    | 15                    | 2333             | EC2629 | 52                    | 173              |

**Supplementary Table S2: Activity and response for each of the graphs in figures 3, 4 and 5.** SD, stable disease defined as volume regression < 50% and increase in volume of < 10% ; PR, partial response defined as volume regression >50% but with measurable tumor (>2 mm<sup>3</sup>) remaining at all times; CR, complete response defined as a disappearance of measurable tumor mass (<2 mm<sup>3</sup>) at some point within 90 days after tumor implantation; cures were defined as CRs without tumor regrowth within the 90-day study time frame.

| <b>Figure # :<br/>Tumor model</b>         | <b>Treatment Regimen</b>                 | <b>n</b> | <b>SD</b> | <b>PR</b> | <b>CR</b> | <b>Cures</b> |
|-------------------------------------------|------------------------------------------|----------|-----------|-----------|-----------|--------------|
| <b>Fig 3a: KB/<br/>nu/nu<br/>mice</b>     | <b>Control mice</b>                      | 4        | 0         | 0         | 0         | 0            |
|                                           | <b>EC2629 0.3 μmol/kg SIW x 2</b>        | 5        | 0         | 0         | 0         | 5            |
| <b>Fig 3c: KB/<br/>nu/nu<br/>rats</b>     | <b>Control rats</b>                      | 3        | 0         | 0         | 0         | 0            |
|                                           | <b>EC2629 0.15 μmol/kg SIW x 2</b>       | 3        | 0         | 1         | 2         | 0            |
| <b>Fig. 3e: KB/<br/>nu/nu<br/>mice</b>    | <b>Control mice</b>                      | 5        | 0         | 0         | 0         | 0            |
|                                           | <b>SJG-136 0.3 mg/kg SIW x 2</b>         | 5        | 0         | 2         | 0         | 2            |
| <b>Fig. 4a: KB-PR/<br/>nu/nu<br/>mice</b> | <b>Control mice</b>                      | 5        | 0         | 0         | 0         | 0            |
|                                           | <b>Paclitaxel 20 mg/kg, TIW x 2</b>      | 5        | 1         | 0         | 0         | 0            |
|                                           | <b>EC2629 0.5 μmol/kg SIW x 2</b>        | 5        | 0         | 0         | 0         | 5            |
| <b>Fig. 4b: KB-CR/<br/>nu/nu<br/>mice</b> | <b>Control mice</b>                      | 4        | 0         | 0         | 0         | 0            |
|                                           | <b>Cisplatin 3 mg/kg, BIW x 2</b>        | 5        | 0         | 0         | 0         | 0            |
|                                           | <b>EC2629 0.5 μmol/kg SIW x 2</b>        | 5        | 0         | 0         | 0         | 5            |
| <b>Fig. 5a: ST502/<br/>nu/nu<br/>mice</b> | <b>Control mice</b>                      | 7        | 0         | 0         | 0         | 0            |
|                                           | <b>Eribulin mesylate 1 mg/kg SIW x 2</b> | 7        | 1         | 1         | 0         | 0            |
|                                           | <b>EC2629 0.27 μmol/kg BIW x 2</b>       | 7        | 0         | 2         | 2         | 3            |
| <b>Fig. 5b: ST738/<br/>nu/nu<br/>mice</b> | <b>Control mice</b>                      | 7        | 0         | 0         | 0         | 0            |
|                                           | <b>Eribulin mesylate 1 mg/kg SIW x 2</b> | 7        | 5         | 2         | 0         | 0            |
|                                           | <b>EC2629 0.27 μmol/kg BIW x 2</b>       | 7        | 2         | 2         | 1         | 2            |

|                                       |                                                   |   |   |   |   |   |
|---------------------------------------|---------------------------------------------------|---|---|---|---|---|
| <b>Fig. 5c: ST040/<br/>nu/nu mice</b> | <b>Control mice</b>                               | 7 | 0 | 0 | 0 | 0 |
|                                       | <b>Paclitaxel 15 mg/kg SIW x 2</b>                | 3 | 0 | 0 | 0 | 0 |
|                                       | <b>EC2629 0.27 <math>\mu</math>mol/kg BIW x 2</b> | 7 | 2 | 3 | 0 | 0 |
| <b>Fig. 5d: ST070/<br/>nu/nu mice</b> | <b>Control mice</b>                               | 7 | 0 | 0 | 0 | 0 |
|                                       | <b>Paclitaxel 15 mg/kg SIW x 2</b>                | 7 | 0 | 0 | 0 | 0 |
|                                       | <b>EC2629 0.27 <math>\mu</math>mol/kg BIW x 2</b> | 7 | 0 | 0 | 0 | 5 |

Supplementary Figure S1

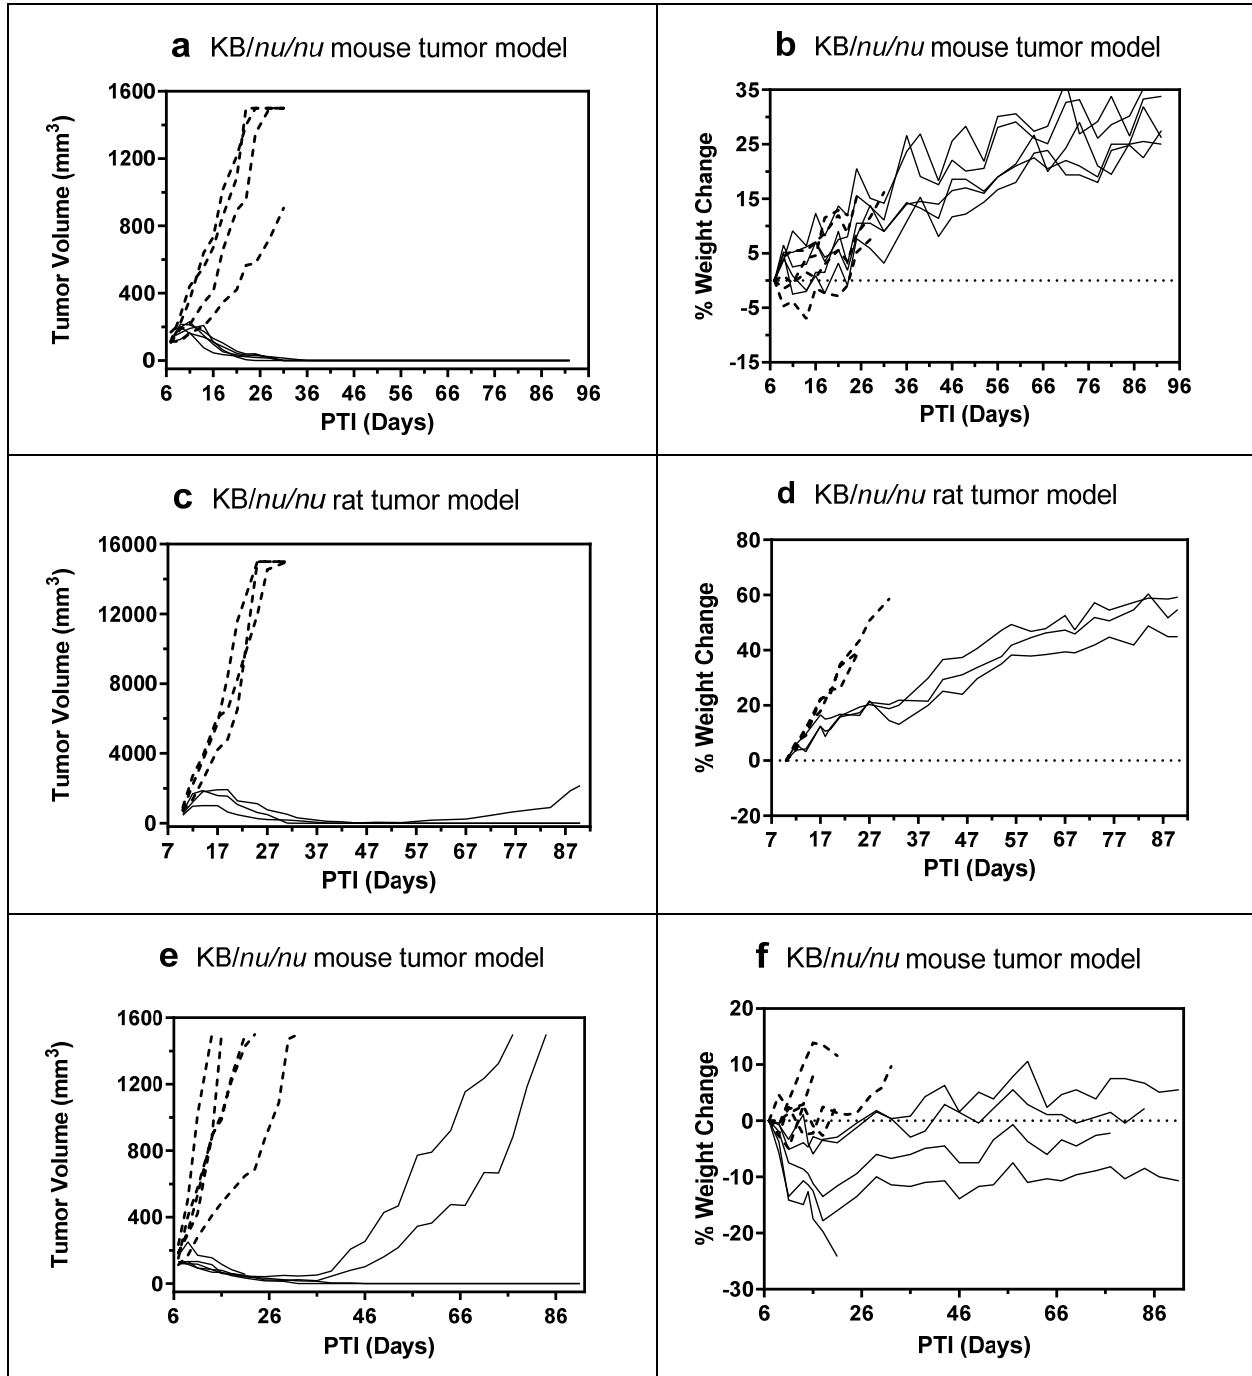

Supplementary Figure S1 Antitumor (a, c, e) and weight change (b, d, f) effects of EC2629 (a, b, c, d) and SJG-136 (e, f) on FR expressing KB tumor *nu/nu* mice (a, b, e, f) and rat (c, d) models. KB tumor cells were inoculated subcutaneously into *nu/nu* mice ( $1 \times 10^6$  cells) and rats ( $5 \times 10^6$  cells) and therapy started on randomized animals with tumors in the 111–168 mm<sup>3</sup> (mice; n = 5) and 411–704 mm<sup>3</sup> (rats; n = 3) range. (---), untreated controls; (—), EC2629, 0.3

$\mu\text{mol/kg}$  (a, b) or  $0.15 \mu\text{mol/kg}$  (c, d) or SJG-136,  $0.3 \text{ mg/kg}$  (e,f) in 0.05% Tween-80, SIW x 2 weeks. Each curve represents the growth of a single tumor in an individual mouse.

### Supplementary Figure S2

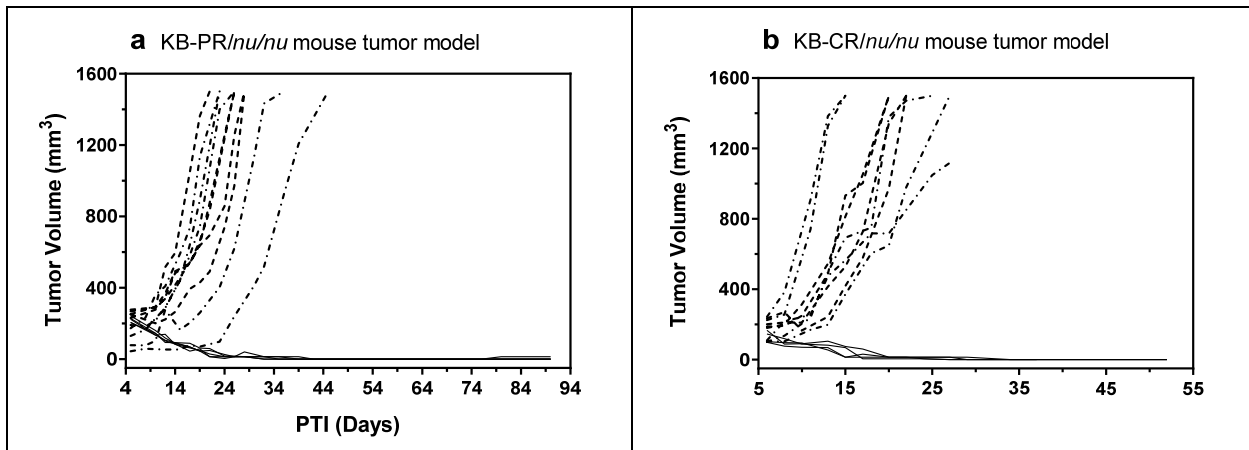

**Supplementary Figure S2 Antitumor effects of EC2629 on FR expressing KB-PR (a) and KB-CR (b) tumors in *nu/nu* mice.** KB-PR (a) or KB-CR (b) tumor cells ( $1 \times 10^6$ ) were inoculated subcutaneously into *nu/nu* mice and therapy started on randomized animals with tumors in the  $205\text{-}243 \text{ mm}^3$  (a) and  $98\text{-}168 \text{ mm}^3$  (b) range. (---), untreated controls; (-.-.-) (a), paclitaxel,  $20 \text{ mg/kg}$ , TIW x 2 weeks (b) cisplatin,  $3 \text{ mg/kg}$ , BIW x 2 weeks; (—), EC2629,  $0.5 \mu\text{mol/kg}$ , SIW x 2 weeks. Each curve represents the growth of a single tumor in an individual mouse.

### Supplementary Figure S3

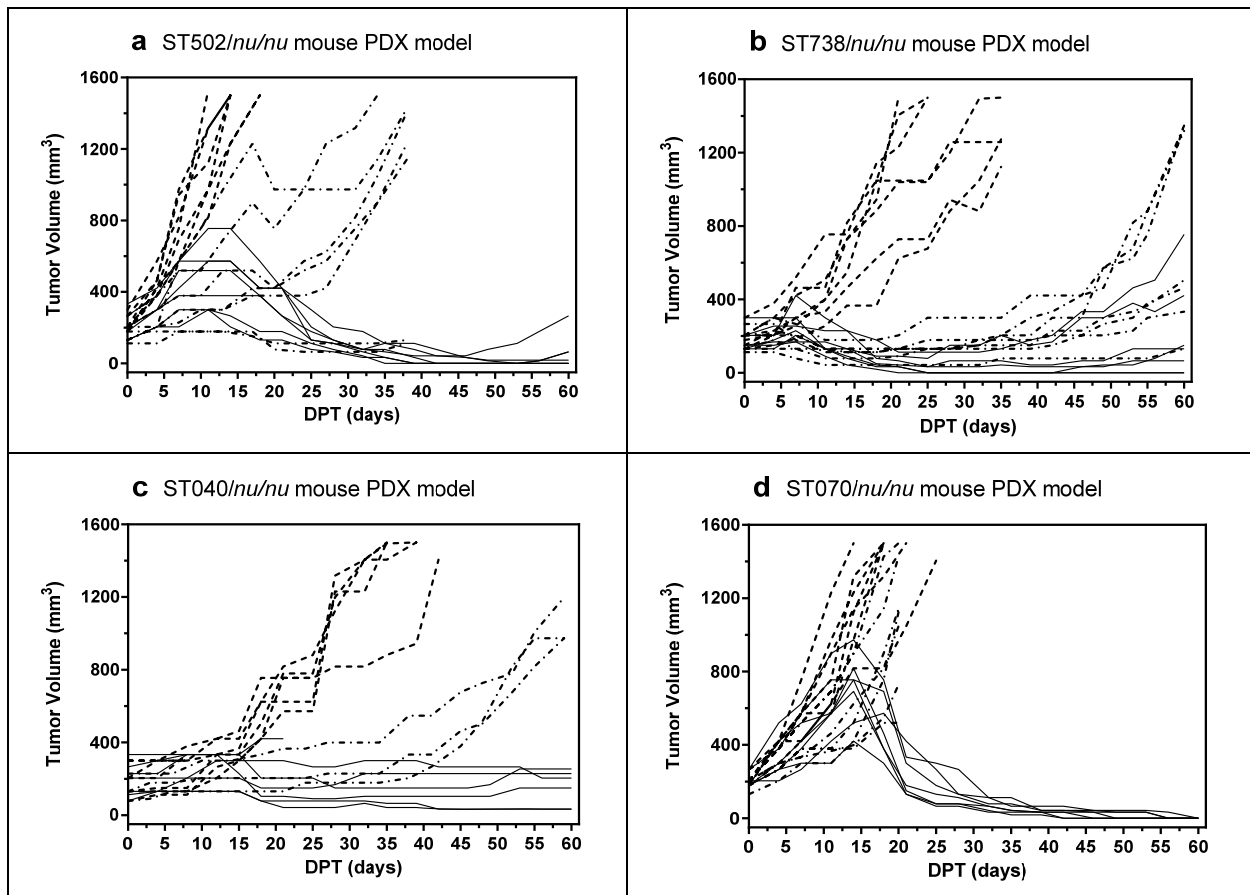

**Supplementary Figure S3 Antitumor effects of EC2629 on patient derived triple negative breast ST502 (a), ST738 (b), endometrial ST040 (c) and ovarian ST070 (d) xenograft models in *nu/nu* mice.** Tumor fragments harvested from host animals were inoculated subcutaneously into *nu/nu* mice and therapy started on randomized animals with tumors in the 112-333 mm<sup>3</sup> (a), 112 to 300 mm<sup>3</sup> (b), 78 to 333 mm<sup>3</sup> (c) and 131 to 266 mm<sup>3</sup> (d) range. (---), untreated controls; (-·-·-), eribulin mesylate, 1 mg/kg SIW x 2 weeks (a, b) or paclitaxel, 15 mg/kg, SIW x 2 weeks (c, d) (—), EC2629, 0.27 μmol/kg, BIW x 2 weeks (a,b,c,d). Each curve represents the growth of a single tumor in an individual mouse
